# Supplementary material for: Folate modified dual pH/reduction-responsive mixed micelles assembled using FA-PEG-PDEAEMA and PEG-SS-PCL for doxorubicin delivery
Source: Royal Society of Chemistry journal article supplement (doi:10.1039/d2cp04045j), 2023-01-01
Supplement: d2cp04045j1.pdf [file d2cp04045j1.pdf]

Supplementary Information Available

**Folate modified dual pH/reduction-responsive mixed micelles assembled by FA-PEG-PDEAEMA and PEG-SS-PCL for doxorubicin delivery**

Chufen Yang<sup>1,2</sup>, Delin Wang<sup>1</sup>, Wenyao Liu<sup>1</sup>, Zexiong Yang<sup>1</sup>, Teng He<sup>1</sup>, Fang Chen<sup>1</sup>, Wenjing Lin<sup>1,2</sup>

<sup>1</sup>*School of Chemical Engineering and Light Industry, Guangdong University of Technology, Guangzhou*

*510006, PR China*

<sup>2</sup>*Jieyang Branch of Chemistry and Chemical Engineering Guangdong Laboratory (Rongjiang Laboratory),*

*Jieyang 515200, China*

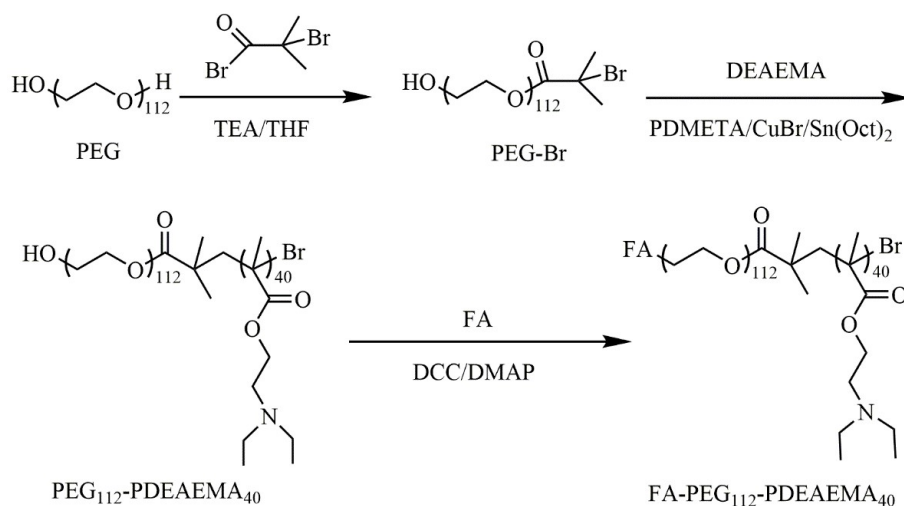

**Scheme S1** Synthetic route of PEG<sub>112</sub>-PDEAEMA<sub>40</sub> and FA-PEG<sub>112</sub>-PDEAEMA<sub>40</sub>.

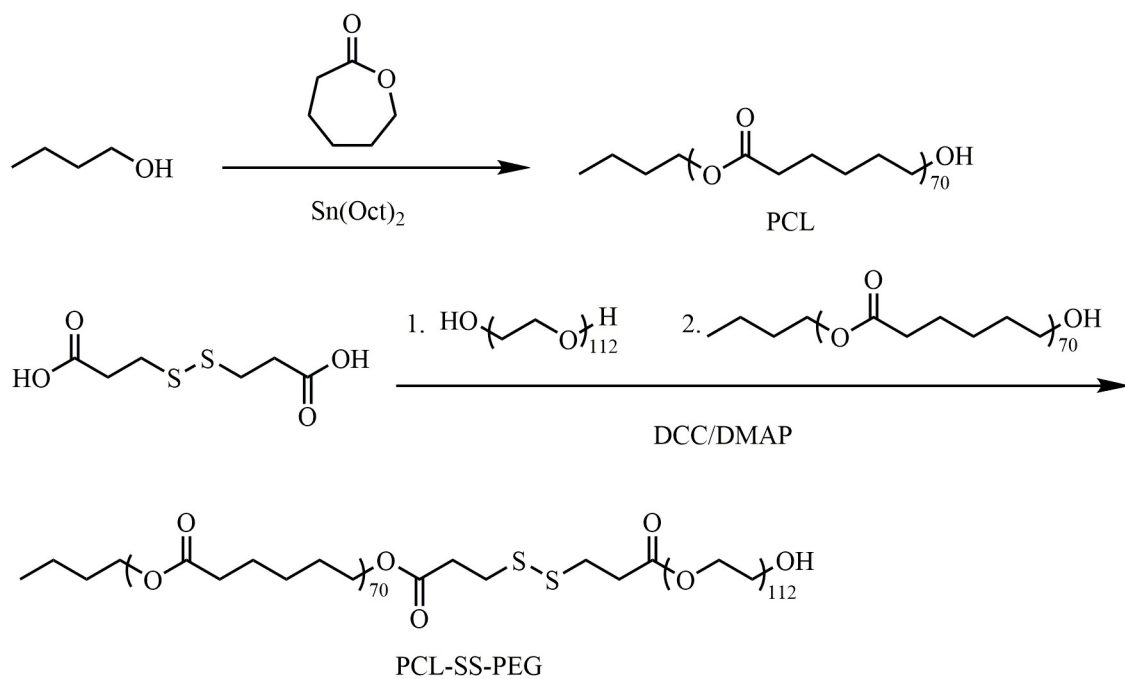

**Scheme S2** Synthetic route of PEG<sub>112</sub>-SS-PCL<sub>70</sub>.

**Table S1** The interaction parameter  $a_{ij}$  between each beads in neutral environment.

| $a_{ij}$ | DEA  | D1   | D2   | D3   | FA1  | FA2  | FA3  | FA4  | MAA  | PCL  | PEG  | S1   | S2   | W  |
|----------|------|------|------|------|------|------|------|------|------|------|------|------|------|----|
| DEA      | 25   |      |      |      |      |      |      |      |      |      |      |      |      |    |
| D1       | 27.6 | 25   |      |      |      |      |      |      |      |      |      |      |      |    |
| D2       | 26.7 | 27.2 | 25   |      |      |      |      |      |      |      |      |      |      |    |
| D3       | 25.6 | 25.4 | 25.7 | 25   |      |      |      |      |      |      |      |      |      |    |
| FA1      | 67.0 | 49.8 | 25.7 | 24.8 | 25   |      |      |      |      |      |      |      |      |    |
| FA2      | 42.8 | 32.2 | 27.3 | 35.0 | 30.3 | 25   |      |      |      |      |      |      |      |    |
| FA3      | 44.8 | 33.1 | 27.8 | 35.9 | 29.6 | 25   | 25   |      |      |      |      |      |      |    |
| FA4      | 56.5 | 40.8 | 26.3 | 32.8 | 26.1 | 26.6 | 26.3 | 25   |      |      |      |      |      |    |
| MAA      | 30.4 | 26.1 | 25.3 | 25.2 | 42.1 | 28.5 | 29.2 | 35.3 | 25   |      |      |      |      |    |
| PCL      | 25.9 | 25.1 | 26.3 | 25.1 | 40.2 | 27.6 | 28.1 | 33.3 | 25.5 | 25   |      |      |      |    |
| PEG      | 30.6 | 28.9 | 27.2 | 26.8 | 31.1 | 25   | 25.1 | 27.1 | 25.9 | 27.6 | 25   |      |      |    |
| S1       | 25.7 | 25.2 | 28.7 | 26.2 | 36.8 | 26.3 | 26.7 | 30.9 | 27.2 | 25.7 | 30.9 | 25   |      |    |
| S2       | 25.7 | 25.2 | 28.7 | 26.2 | 36.8 | 26.3 | 26.7 | 30.9 | 27.2 | 25.7 | 30.9 | 25   | 25   |    |
| W        | 68.3 | 42.9 | 26.9 | 23.7 | 23.8 | 31.6 | 32.7 | 24.3 | 34.2 | 73.2 | 26.1 | 74.1 | 74.1 | 25 |

**Table S2** The interaction parameter  $a_{ij}$  between each beads in acidity and high reducibility.

| $a_{ij}$ | DEAH | D1   | D2   | D3H  | FA1H | FA2  | FA3  | FA4  | MAA  | PCL  | PEG  | S1H  | S2H  | W  |
|----------|------|------|------|------|------|------|------|------|------|------|------|------|------|----|
| DEAH     | 25   |      |      |      |      |      |      |      |      |      |      |      |      |    |
| D1       | 31.7 | 25   |      |      |      |      |      |      |      |      |      |      |      |    |
| D2       | 24.8 | 27.2 | 25   |      |      |      |      |      |      |      |      |      |      |    |
| D3H      | 24.3 | 21.4 | 23.2 | 25   |      |      |      |      |      |      |      |      |      |    |
| FA1H     | 23.7 | 89.8 | 25.7 | 24.8 | 25   |      |      |      |      |      |      |      |      |    |
| FA2      | 42.8 | 32.2 | 27.3 | 35   | 36.5 | 25   |      |      |      |      |      |      |      |    |
| FA3      | 44.8 | 33.1 | 27.8 | 45.9 | 46.6 | 25   | 25   |      |      |      |      |      |      |    |
| FA4      | 25.5 | 40.8 | 26.3 | 22.8 | 20.7 | 26.6 | 26.3 | 25   |      |      |      |      |      |    |
| MAA      | 31.4 | 26.1 | 25.2 | 41.2 | 52.1 | 28.5 | 29.2 | 35.3 | 25   |      |      |      |      |    |
| PCL      | 96.8 | 25.1 | 26.3 | 92.5 | 47.2 | 27.6 | 28.1 | 33.3 | 25.5 | 25   |      |      |      |    |
| PEG      | 22.8 | 28.9 | 27.2 | 21.2 | 23.8 | 25   | 25.1 | 27.1 | 25.9 | 27.6 | 25   |      |      |    |
| S1H      | 22.4 | 35.4 | 26.4 | 20.3 | 24.6 | 76.4 | 43.3 | 22.5 | 30.8 | 54.7 | 22.3 | 25   |      |    |
| S2H      | 22.4 | 35.4 | 26.4 | 20.3 | 24.6 | 76.4 | 43.3 | 22.5 | 30.8 | 54.7 | 22.3 | 25   | 25   |    |
| W        | 10.8 | 42.9 | 26.9 | 8.7  | 10.6 | 31.6 | 32.7 | 24.3 | 34.2 | 73.2 | 26.1 | 10.2 | 10.2 | 25 |

**Table S3** GPC and <sup>1</sup>H NMR results of polymeric products.

| Sample                                       | $M_{n,Theory}^a$ | $M_{n,GPC}^b$ | $M_{n,NMR}^c$ | PDI <sup>b</sup> |
|----------------------------------------------|------------------|---------------|---------------|------------------|
| PEG <sub>112</sub> -Br                       | 5093             | 4736          | 4892          | 1.20             |
| PEG <sub>112</sub> -PDEAEMA <sub>40</sub>    | 12069            | 12746         | 12227         | 1.40             |
| FA-PEG <sub>112</sub> -PDEAEMA <sub>40</sub> | 12492            | 13264         | 12786         | 1.52             |
| PEG <sub>112</sub> -SS-COOH                  | 5138             | 4597          | 4688          | 1.21             |
| PCL <sub>70</sub>                            | 8054             | 7953          | 7989          | 1.44             |
| PCL <sub>70</sub> -SS-PEG <sub>112</sub>     | 13174            | 12809         | 12180         | 1.27             |

<sup>a</sup> Calculation from the feed ratio of monomers to initiator; <sup>b</sup> Measured by GPC. <sup>c</sup> Calculation by <sup>1</sup>H NMR spectra.

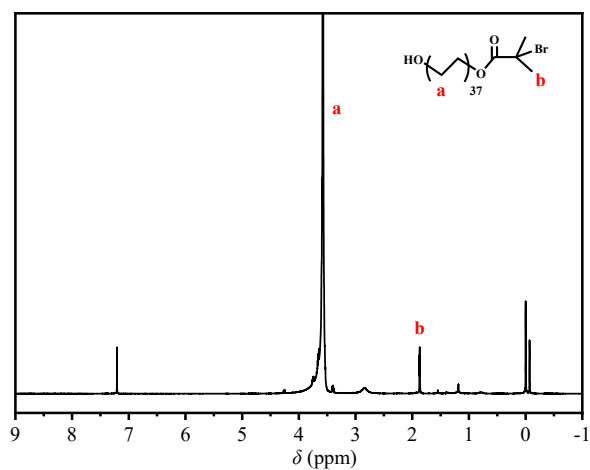

**Fig. S1.**  $^1\text{H}$  NMR spectrum of the macroinitiator PEG<sub>37</sub>-Br.

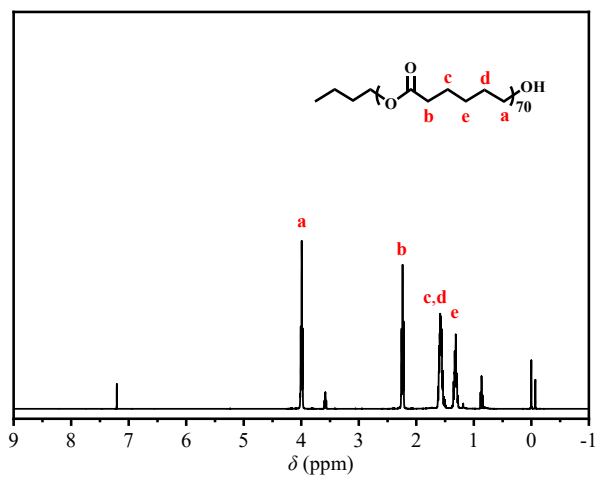

**Fig. S2.**  $^1\text{H}$  NMR spectrum of polymer PCL-OH.

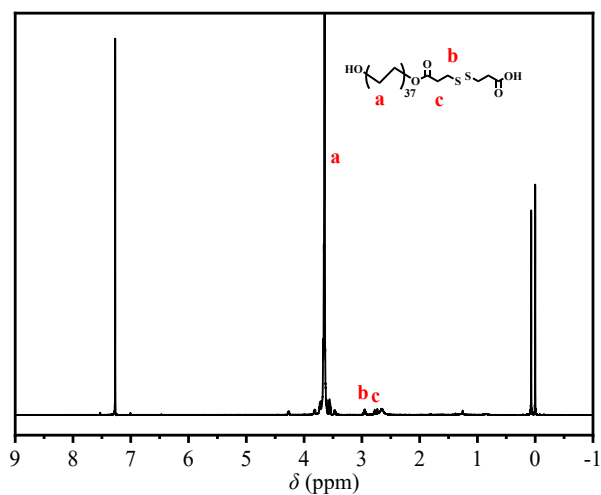

**Fig. S3.**  $^1\text{H}$  NMR spectrum of polymer PEG-SS-COOH.

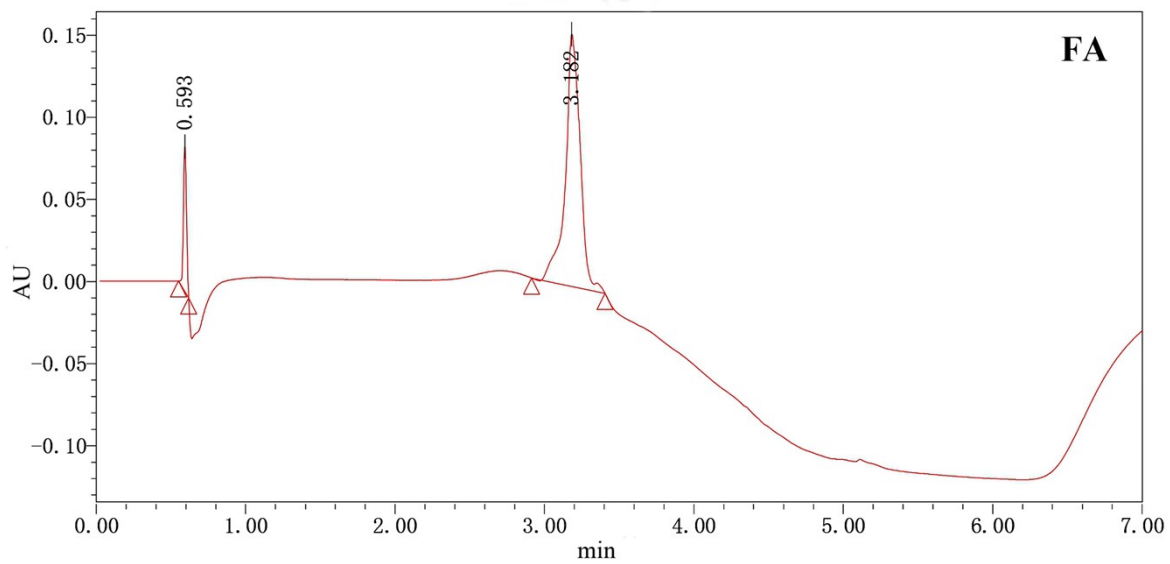

**Fig. S4.** UPLC of FA.

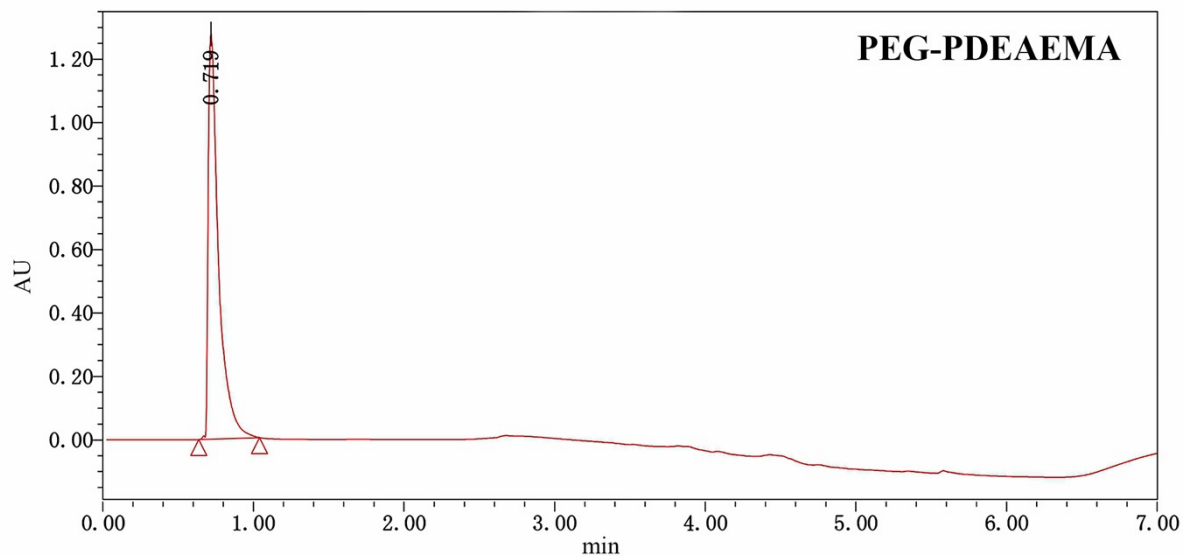

**Fig. S5.** UPLC of PEG<sub>112</sub>-PDEAEMA<sub>40</sub>.

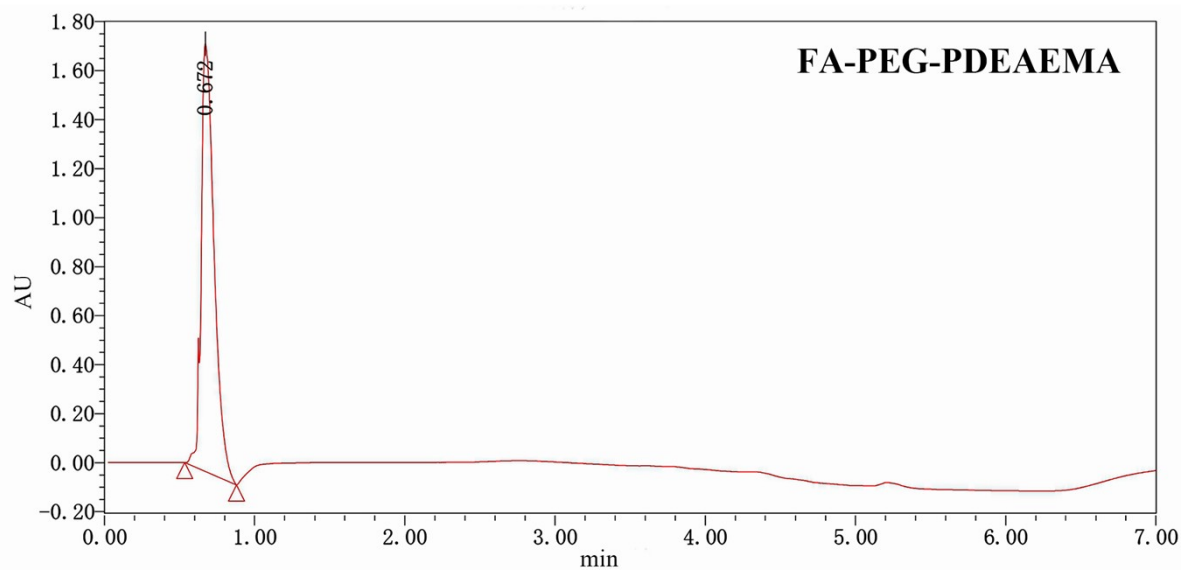

**Fig. S6.** UPLC of FA-PEG<sub>112</sub>-PDEAEMA<sub>40</sub>.

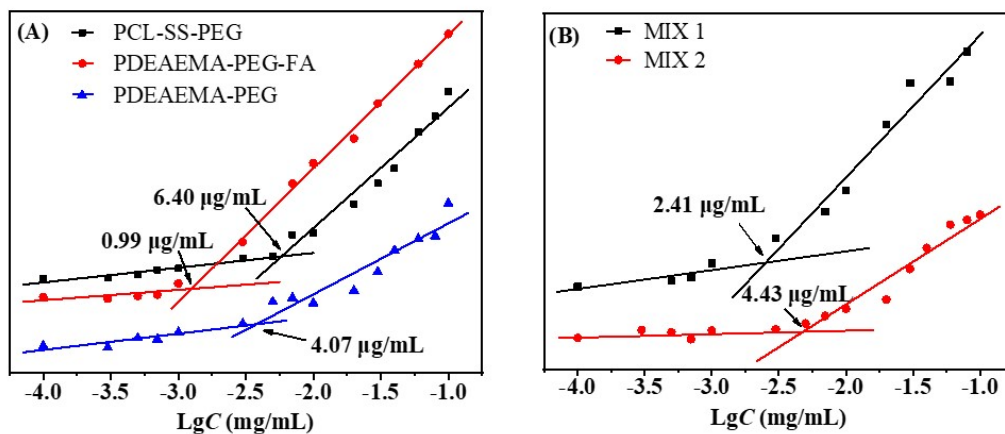

**Fig. S7.** Different ratios of pyrene in neutral aqueous solution for (A) PDEAEMA<sub>40</sub>-PEG<sub>112</sub>, PDEAEMA<sub>40</sub>-PEG<sub>112</sub>-FA, PEG<sub>112</sub>-SS-PCL<sub>70</sub> and (B) mixed polymers MIX1 and MIX2 at various concentrations.

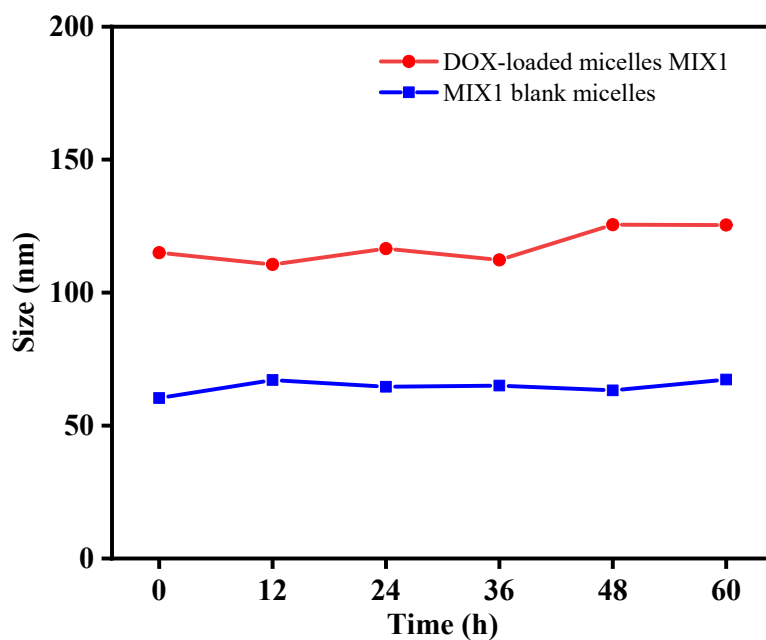

**Fig. S8.** serum stability of DOX-loaded micelles and blank micelles.
